# Supplementary material for: Navigating Objectification, Desensitization, and Personification: Medical Student Strategies for Engaging with Donor Bodies in the Anatomy Lab
Source: Research Square preprint supplement (doi:10.21203/rs.3.rs-6925927/v1), 2025-07-09
Supplement: Supplementary file 1 [file a26a7968efc8113f91bd046c.docx]

**Navigating Objectification, Desensitization, and Personification: Medical Student Strategies for Engaging with Donor Bodies in the Anatomy Lab**

Interview Questions

1. **Can you describe your emotional experience throughout your time in the anatomy dissection lab?**
   *(Prompt for elaboration on initial reactions, changes over time, emotional coping, etc.)*
2. **Did you encounter any moral or ethical dilemmas while participating in dissection? If so, how did you navigate them?**
   *(Encourages reflection on internal conflict, value systems, and ethical reasoning.)*
3. **Was it easy or difficult to talk about your dissection experience with family or friends? Why do you think that was?**
   *(Invites exploration of social context, communication challenges, and stigma.)*
4. **Would you consider donating your body to an anatomy lab, or be comfortable with a loved one doing so?**
   *(Promotes reflection on personal beliefs, boundaries, and the meaning of body donation.)*
