# Supplementary material for: Navigating Objectification, Desensitization, and Personification: Medical Student Strategies for Engaging with Donor Bodies in the Anatomy Lab
Source: Research Square preprint supplement (doi:10.21203/rs.3.rs-6925927/v1), 2025-07-09
Supplement: Supplementary file 2 [file b15978ddebb988d1bdf4bd61.docx]

**Navigating Objectification, Desensitization, and Personification: Medical Student Strategies for Engaging with Donor Bodies in the Anatomy Lab**

Focus Group Prompts

1. **“Looking back on your time in the dissection lab, how did you manage the emotional impact of working with a donor body—did you find yourself distancing, humanizing, or approaching the experience in another way?”**
   *Follow-up probe:* What helped you make that choice or shift your approach over time?
2. **“In what ways did conversations (or lack thereof) with peers, faculty, or loved ones influence how you processed the experience of dissection?”**
   *Follow-up probe:* Were there any challenges or helpful moments that shaped how you engaged emotionally or ethically?
3. **“If you could offer advice to future students entering the lab, what would you say about navigating the balance between respect for the donor and the demands of learning?”**
   *Follow-up probe:* How did your views evolve throughout the course, and what strategies do you think should be supported or taught?
